# Supplementary material for: The SGLT2 Inhibitor Canagliflozin Prevents Carcinogenesis in a Mouse Model of Diabetes and Non-Alcoholic Steatohepatitis-Related Hepatocarcinogenesis: Association with SGLT2 Expression in Hepatocellular Carcinoma
Source: Int J Mol Sci. 2019 Oct 22;20(20):5237. doi: 10.3390/ijms20205237 (PMC6829338; doi:10.3390/ijms20205237)
Supplement: Supplementary file 1 [file ijms-20-05237-s001.pdf]

# Supplementary Figure legends

## Supplementary Fig.1

- a Examination of H-E stained liver sections revealed fatty degeneration, inflammatory cell infiltration, and hepatocellular ballooning, predominantly around the central veins, in mice from the vehicle group
- b The NAS score was significantly lower in the canagliflozin group compared with the vehicle group .
- c Gene expression of SOCS (suppressor of cytokine signaling) 3 was decreased in the canagliflozin group.
- d Sirius red staining showed no significant difference in the collagen deposition area between the canagliflozin group and the vehicle group.
- e Expression of type 3 collagen mRNA was significantly lower in the canagliflozin group than in the vehicle group.

## Supplementary Fig.2

Expressions of both SGLT1 and SGL2 in HepG2 cells, THP-1 cells, and human umbilical vein endothelial cells (HUVEC).

## Supplementary Fig.3

Gene expression of CCND1 (cyclin D1) between treatment with 10  $\mu$ M canagliflozin and the control

## Supplementary Table 1

Body weight and biochemical parameters in NASH mice under diabetic background in Study 1

Supplementary Fig.1

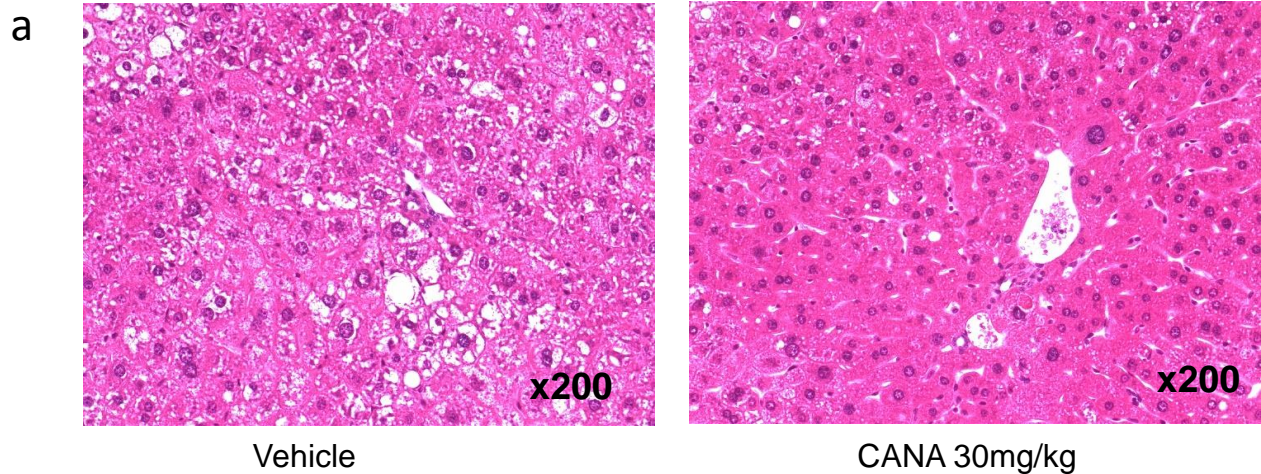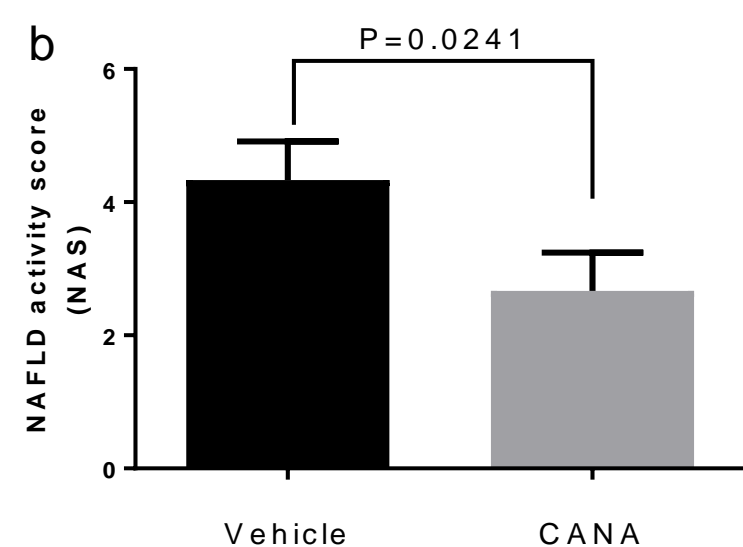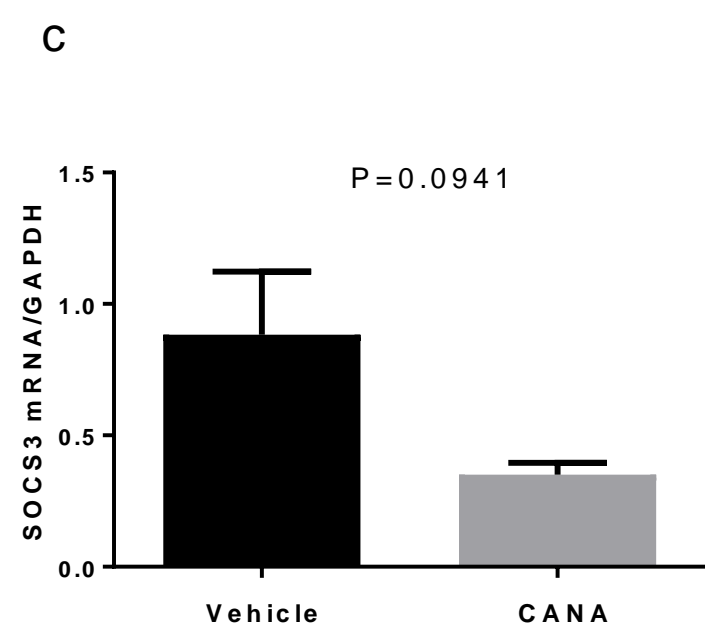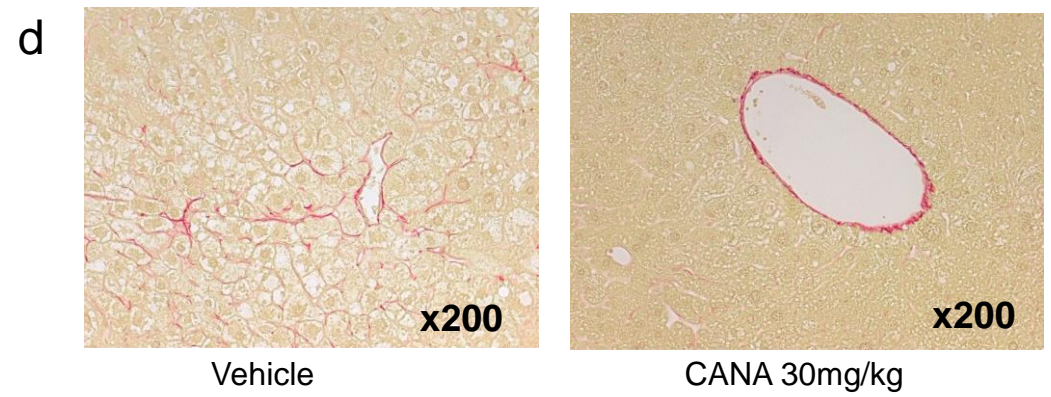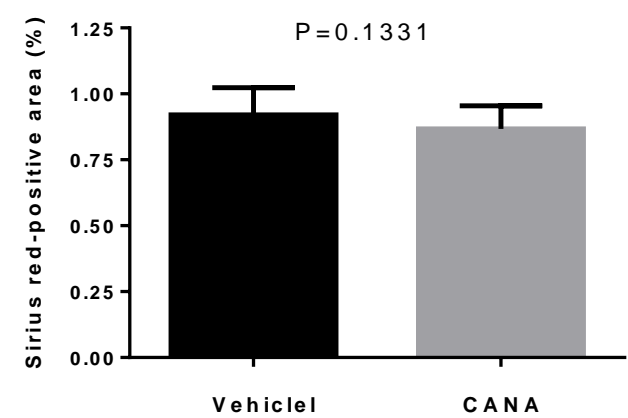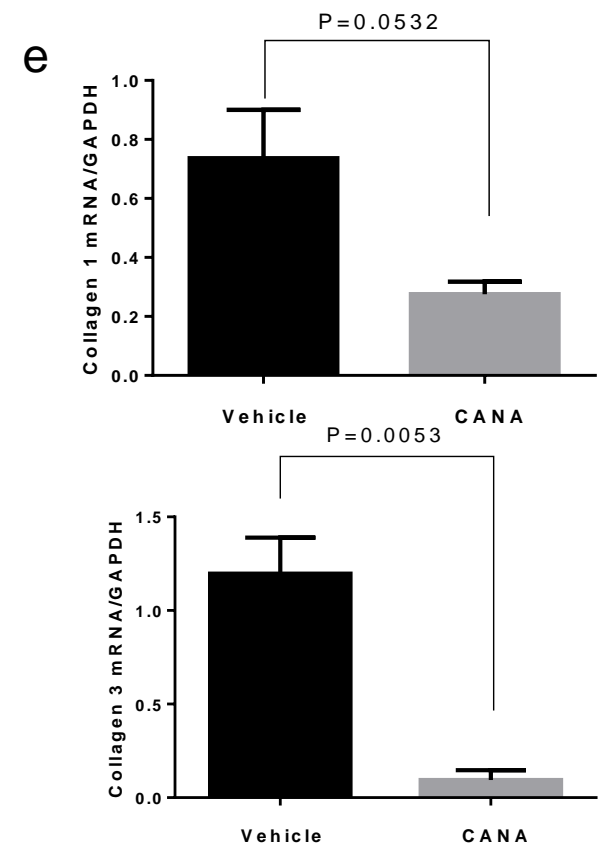

Supplementary Fig.2

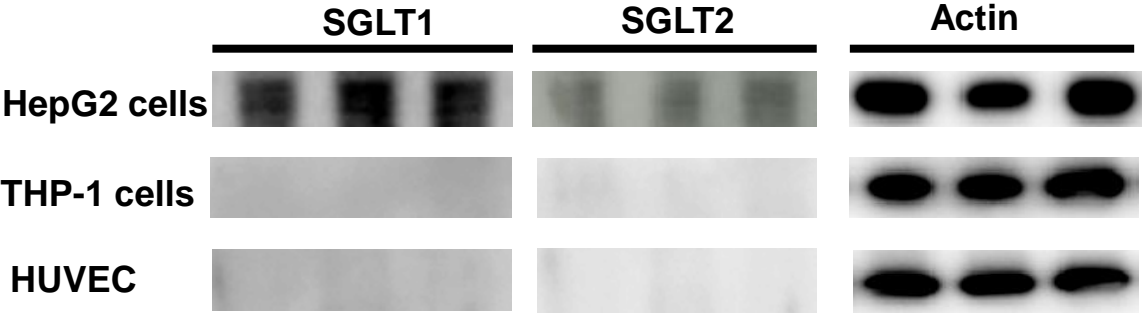

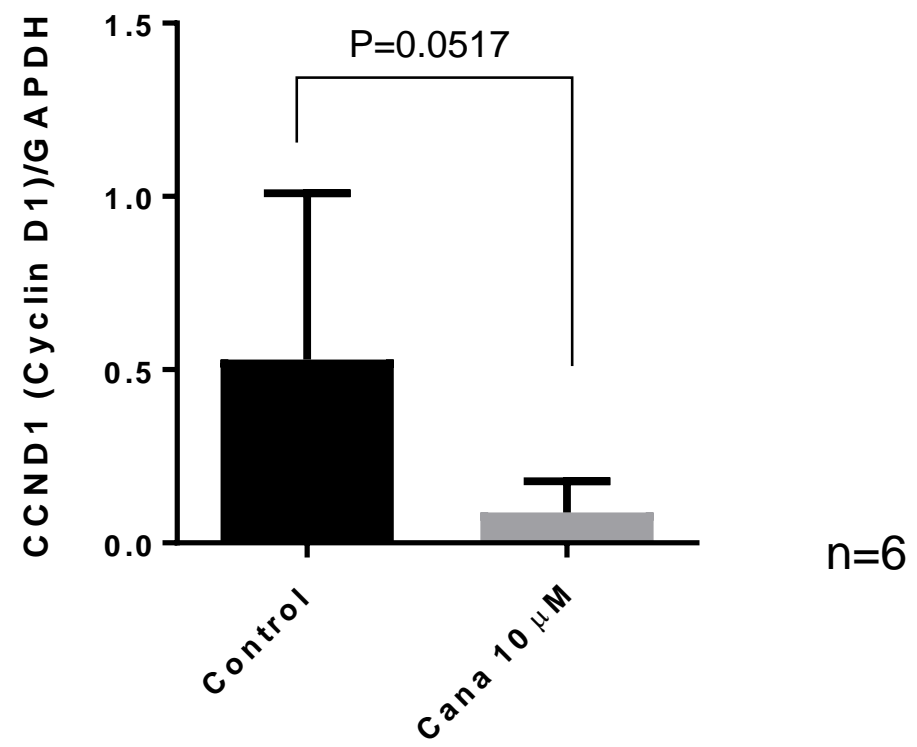

Supplementary Table 1

Body weight and biochemical parameters in NASH mice under diabetic background

|                              | vehicle  | Cana 30mg/Kg | P-value |
|------------------------------|----------|--------------|---------|
|                              | (n=3)    | (n=3)        |         |
| Body weight (g)              |          |              |         |
| Day 0                        | 19.0±1.0 | 19.0±1.2     | 0.9726  |
| Day 21                       | 22.7±2.6 | 21.3±1.3     | 0.4573  |
| Liver-to-weight ratio (mg/g) | 7.0±0.4  | 5.7±0.3      | 0.0105  |
| Plasma glucose (mg/dl)       | 587±43   | 310±40       | 0.0012  |
| ALT (U/l)                    | 45.0±4.4 | 31.7±7.8     | 0.0605  |
| Triglyceride (mg/dl)         | 889±193  | 401±140      | 0.0240  |
| Serum insulin (pg/ml)        | 844±556  | 1018±1372    | 0.7000  |

Data are mean±SD. Cana, canagliflozin; ALT, alanine aminotransferase.
